# Supplementary material for: Local and remote mean and extreme temperature response to regionalaerosol emissions reductions
Source: Copernicus journal article supplement (doi:10.5194/acp-2019-1096), 2019-12-09
Supplement: Supplementary file 1 [file acp-2019-1096-supplement.pdf]

## **Supporting information for...**

# **Local and remote mean and extreme temperature response to regional aerosol emissions reductions**

**Daniel M. Westervelt<sup>1,2</sup>, Nora R. Mascioli<sup>3</sup>, Arlene M. Fiore<sup>1,4</sup>, Andrew J. Conley<sup>5</sup>, Jean-François Lamarque<sup>5</sup>, Drew T. Shindell<sup>6</sup>, Greg Faluvegi<sup>2,7</sup>, Michael Previdi<sup>1</sup>, Gustavo Correa<sup>1</sup>, Larry W. Horowitz<sup>8</sup>**

<sup>1</sup>Lamont-Doherty Earth Observatory, Columbia University, Palisades, New York, USA

<sup>2</sup>NASA Goddard Institute for Space Studies, New York, New York, USA

<sup>3</sup>University of California San Diego, School of Marine Sciences, San Diego, California, USA

<sup>4</sup>Department of Earth and Environmental Sciences, Columbia University, Palisades, New York, USA

<sup>5</sup>National Center for Atmospheric Research, Boulder, Colorado, USA

<sup>6</sup>Nicholas School of the Environment, Duke University, Durham, North Carolina, USA

<sup>7</sup>Center for Climate Systems Research, Columbia University, New York, NY, USA

<sup>8</sup>National Oceanic and Atmospheric Administration, Geophysical Fluid Dynamics Laboratory, Princeton, New Jersey, USA

*Correspondence to:* Daniel M. Westervelt (danielmw@ldeo.columbia.edu)

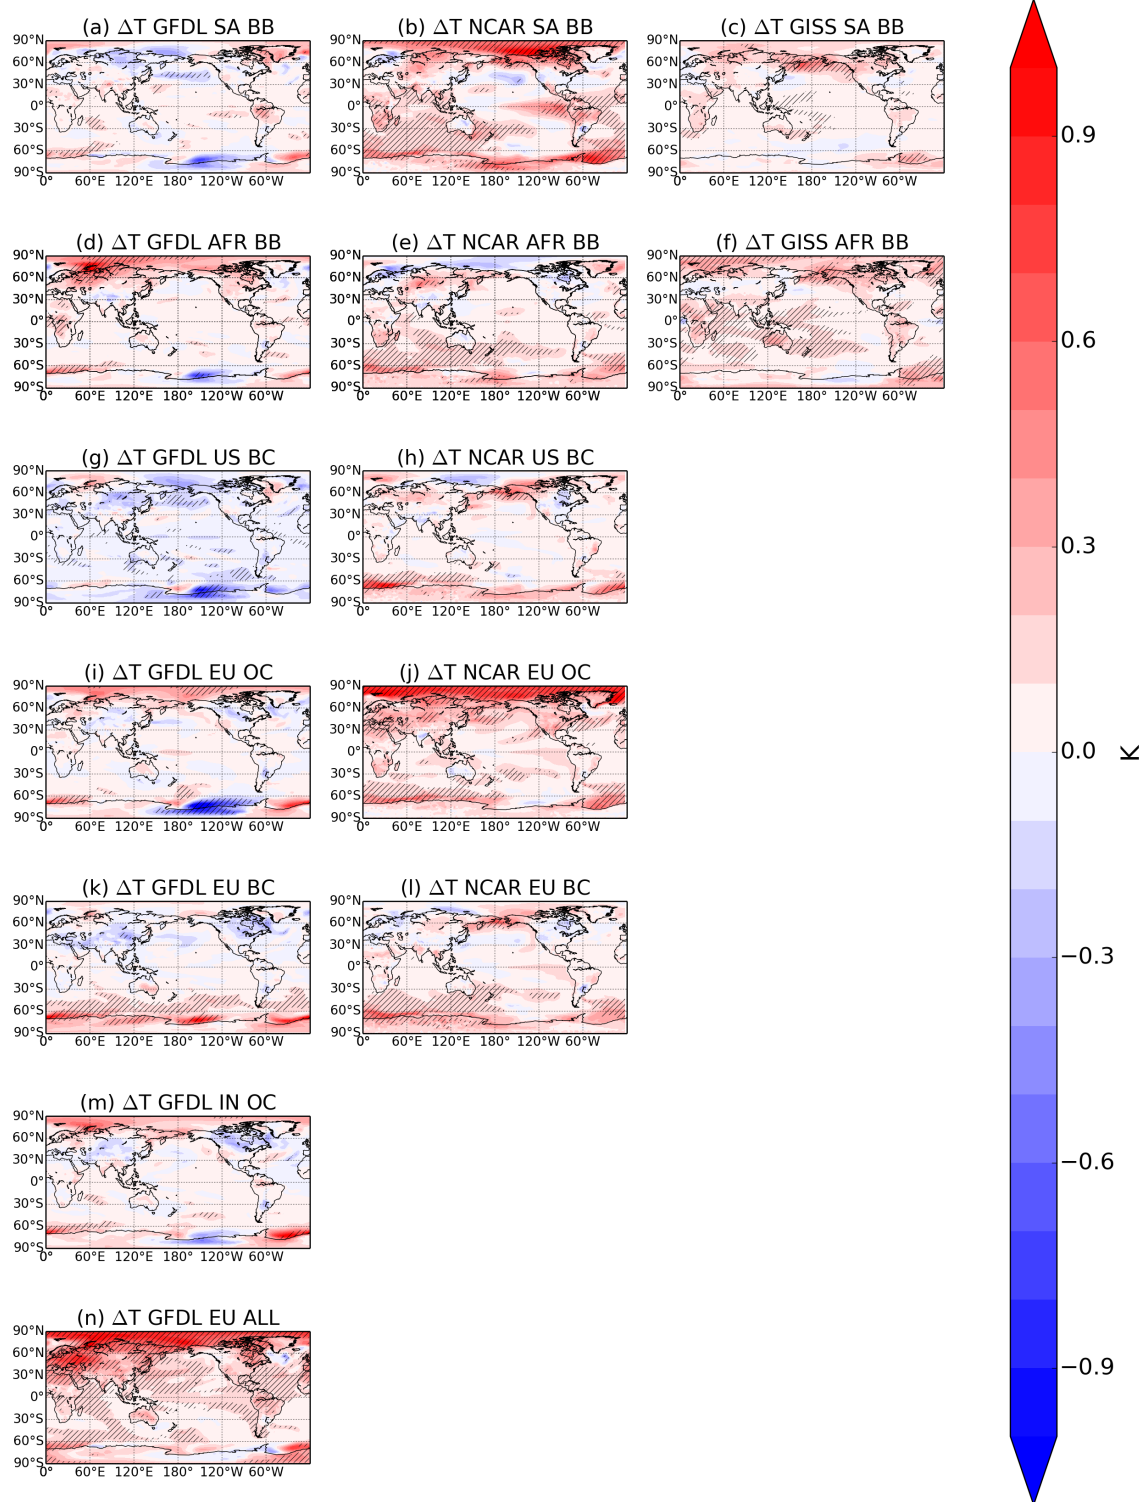

**Figure S1: 200-year annual mean surface temperature response to aerosol emissions decreases in each of the three models (GFDL-CM3, first column; NCAR-CESM1, second column; GISS-E2, third column) for several different regional emissions decreases (see Table 1)**

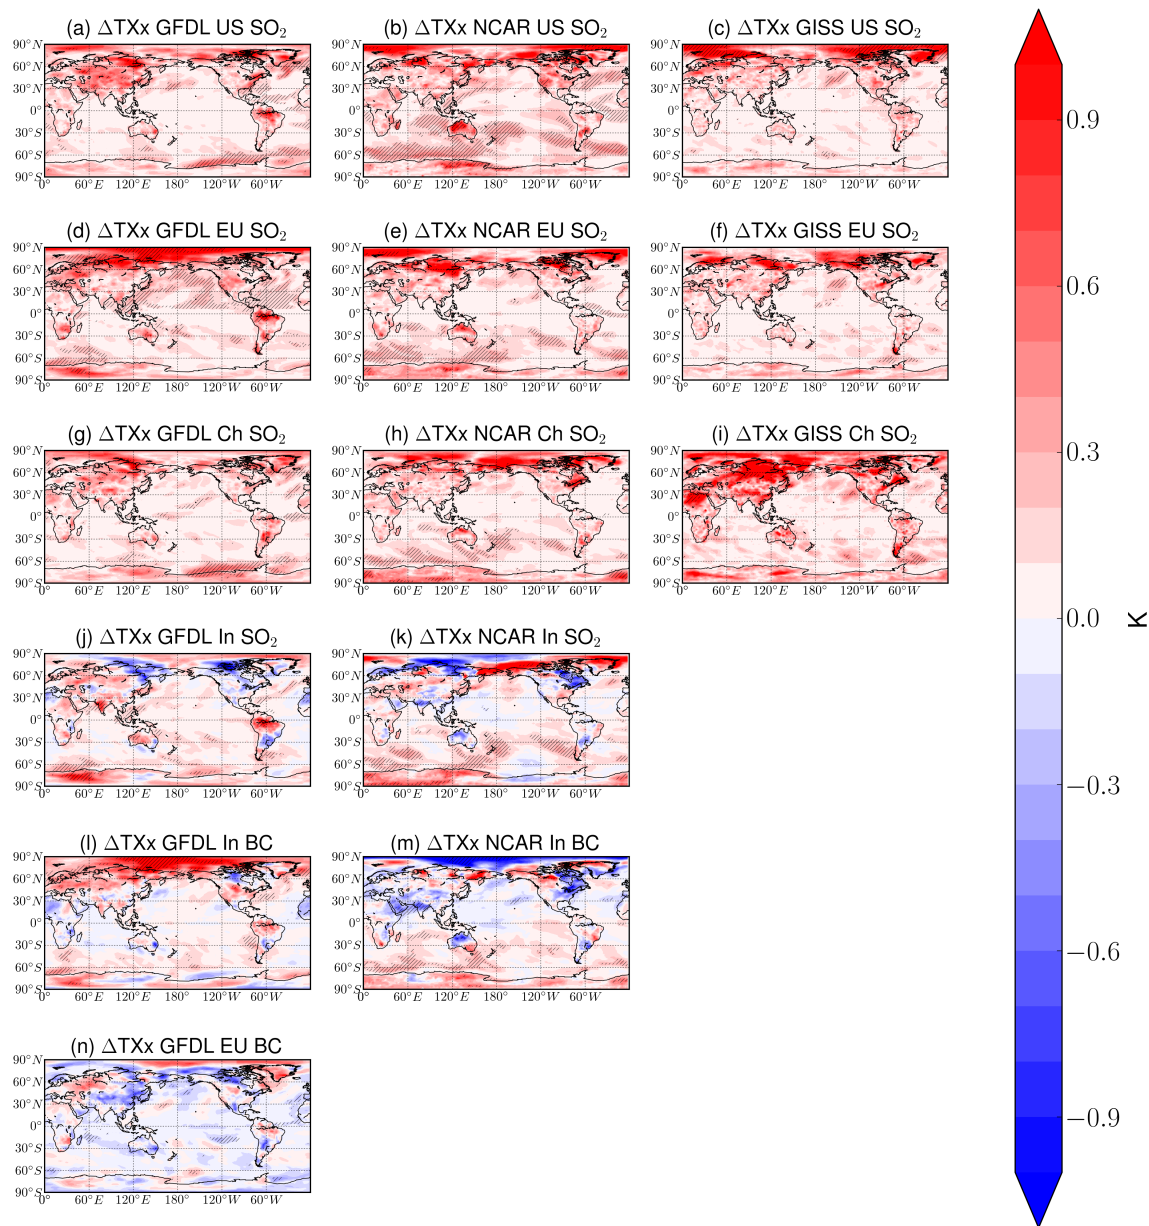

**Figure S2: 200-year winter (DJF) extreme temperature (TXx) responses (K) to aerosol emissions decreases in each of the three models (GFDL-CM3, first column; NCAR-CESM1, second column; GISS-E2, third column) for several different regional emissions decreases (simulations indicated in figure titles; see Table 1). Hatching represents statistical significance at the 95% level according to a Student's t-test with the False Discovery Rate method from Wilks (2016) applied.**

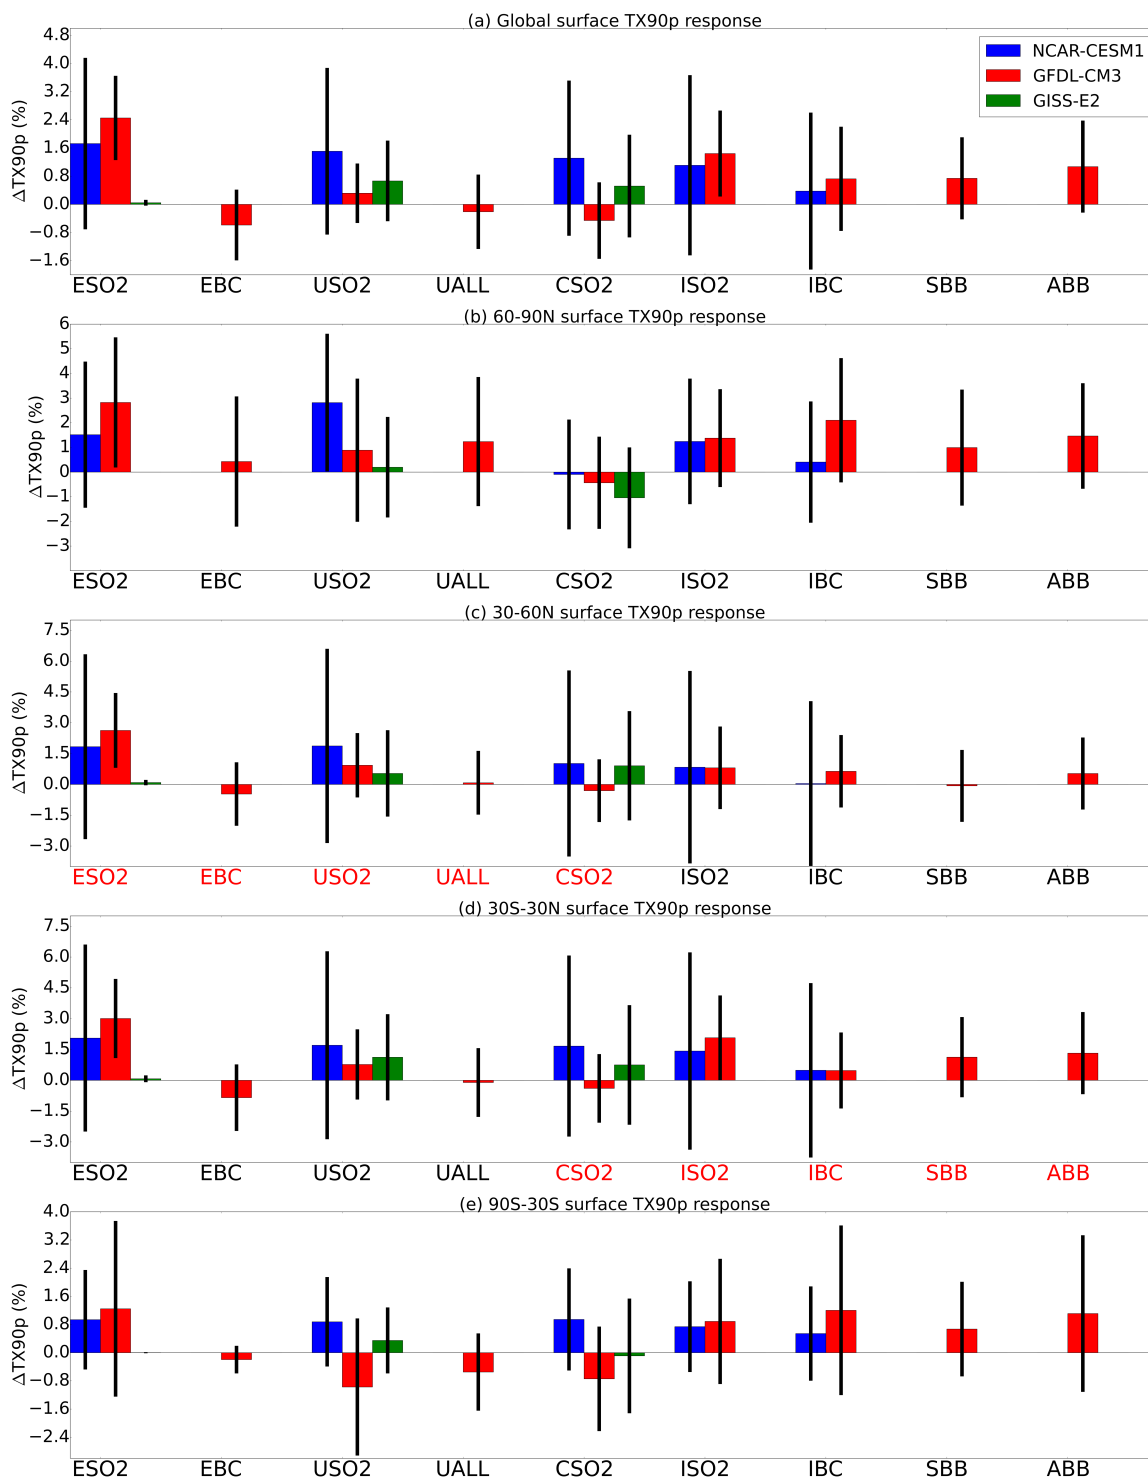

Figure S3: Same as Figure 7 but for TX90p.
